# Supplementary material for: A comparison of teacher’s involvement in curriculum development in developing and developed countries: a case study of Namibia
Source: Frontiers journal article supplement (doi:10.3389/feduc.2023.1243573), 2023-09-25
Supplement: Data_Sheet_1.PDF [file Data_Sheet_1.PDF]

## 5. Annexures

### 5.1 Annexure 1: Questionnaire for NIED officials

#### Questionnaire

Dear Respondent,

Through this brief questionnaire, your answers will be helpful in probing how teachers are involved in curriculum development and or/ policy making. The research associated with this study attempts to add to the body of knowledge in the discourse of education. Furthermore, the study will create public awareness, empower and equip teachers in their role as educators in the delivery of secondary education within the context of Namibia.

|                                                                                                           |
|-----------------------------------------------------------------------------------------------------------|
| <b>Personal questions:</b>                                                                                |
| 1) How long have you been working at NIED or any policy making or review body?                            |
|                                                                                                           |
|                                                                                                           |
| 2) What is your role in curriculum development?                                                           |
|                                                                                                           |
|                                                                                                           |
|                                                                                                           |
| <b>Curriculum development:</b>                                                                            |
| • To your knowledge, how does the Namibian government conduct curriculum development or review processes? |
|                                                                                                           |
|                                                                                                           |
|                                                                                                           |
|                                                                                                           |
|                                                                                                           |

- Who are the stakeholders or parties involved in the curriculum development process?

- What are the different stages in developing the curriculum?

- How do teachers participate in these different stages?

- Through what structures or systems do teachers participate in the curriculum?

- In Your opinion why is it important to participate in the development of the curriculum?

[illegible]

## **5.2 Annexure 2: Interview Protocol for secondary school teachers**

### **Interview Protocol**

Title: "Understanding the Teacher voices in the Namibian secondary school system: A critical analysis of teacher involvement in curriculum development and policy-making.

Time of interview: \_\_\_\_\_

Date: \_\_\_\_\_

Place: \_\_\_\_\_

Interviewee: \_\_\_\_\_

### **Brief description of the study.**

The study entails the investigation of the role of teachers and the nature of their involvement in the curriculum and policy making in Namibia. Namibia has transitioned from an old curriculum model to a new system which accommodates the restructuring of basic education to empower scholars or learners to actively contribute and participate to the industry and economy at an earlier stage rather than complete the last grade of high school. In light of this it is critical to review how key stakeholders particularly the teachers are involved in developing, review and implementing the curriculum so as to improve the delivery of education in today's context and in near future. The research is supported by the notion that teachers are one of the key stakeholders in developing the curriculum and as such the success of the curriculum is dependent on their active participation and or inclusion.

### **Personal Questions**

- 1) How long have you worked as a teacher?
- 2) What grade are you currently teaching?
- 3) Follow up question: What subject are you currently teaching?

### **Curriculum Development**

- Have you ever participated in curriculum development and policy making?  
(Follow up question: if yes, how have you been involved?)
- Which body if any is responsible for the review and or development of the curriculum for basic education?

- In your own words, what is the role of teacher involvement in planning, developing, implementing and evaluating the curriculum?

**(Rephrased: What role can the teacher play in developing the curriculum?)**

- Based on your understanding and /or experience, are teachers involved directly or indirectly in curriculum development processes. If yes, to what extent are they involved?
- What structures if any are put in place to accommodate or involve teachers in the curriculum development process?
- In your opinion, how do you think teachers should be involved in developing the curriculum?
- Why do you think it is important for teachers to participate in the curriculum development process?
- What are the consequences if any, of not involving teachers in curriculum development processes?

#### **Teacher voice**

- Are the opinions or ideas of teachers regarding the curriculum taken into consideration?

**(Addition: With regards to the current curriculum)**

#### **General**

- How do you see the relationship between the involvement of teachers in the curriculum development and :
  - a) Learner performance
  - b) Teacher empowerment

---

Thank you for your participation in this research, your assistance is greatly appreciated

---

### **5.3 Annexure 3: Ethics clearance letter to the Director of NIED**

Zander Q Heights 13  
28 Doornkraal Street  
Annadale,  
Polokwane, 0699  
South Africa.

11<sup>th</sup> of October 2021.

**National Institute for Educational Development (NIED)**

Private Bag 2034  
Voortrekker Road  
Okahandja  
Namibia

To whom it may concern,

**RE: REQUEST FOR PERMISSION TO COLLECT DATA AT NATIONAL INSTITUTE  
FOR EDUCATIONAL DEVELOPMENT (NIED).**

I, Des'Ree Desta Matiki a Namibian citizen by birth studying towards a Master of Education Degree programme in Curriculum studies at the University of Johannesburg (South Africa) via distance learning. As per requirements of the Faculty/Department of education, in fulfilling the requirements of the post-graduate degree, I am required to conduct a full dissertation (formal research) on any topic of academic and or/ professional interest. In light of the above, i am conducting a study/research titled, **“Understanding the Teacher voices in the Namibian secondary school system: a critical analysis of teacher involvement in curriculum development and policy-making”**. I kindly do hereby request to conduct structured questionnaires with NIED officials (Namibia) as part of my data collection solely for the purposes of academic research on the above mentioned subject. I plan to conduct purposive sampling with 5-10 different officials which will be sent electronically via email based on their relative

practising and or/ experience and availability to participate among other factors. The Questionnaire data collection process is envisaged to take at least a week at most with a target of 5-10 officials/ participants. I will make formal contact and arrangements prior to engaging with participants so as to be accommodated in their work schedule and not impose on them. In light of the Covid-19 pandemic, I will adhere to enforced regulations in line with Department of Health and all protocols with a strategy of facilitating contact via electronic platform(s) where necessary as a mitigation strategy to the challenges likely to be faced in our current context. Furthermore, I am physically residing in Polokwane, South Africa and it would be practical and much easier for me to conduct my research via email correspondence and /or other form of electronic platform where applicable, in line of Covid 19 pandemic and restrictions on travel among other factors.

Therefore, I am kindly requesting for assistance from the department to be granted permission in line with ethic clearance protocols to collect data as part of my study/ academic research. The aim of the study is to enhance the understanding of teacher involvement in curriculum development and policy-making processes in the context of Namibian Secondary Education and add towards the body of knowledge in the discourse of education. The research will contribute positively to the academic discourse in the subject area of study and raise awareness of solutions to any perceived challenges or opportunities in curriculum development and policy making. Moreover, participant involvement will positively empower the participants to actively contribute to their present and future in the delivery of education and improvement life and wellbeing of society and community at large.

Your assistance in this regard is greatly appreciated.

Yours faithfully,

**Des'Ree Desta Matiki**

Contact details: Mobile (+27 62 116 0406)/ WhatsApp (+264 81 277 2297)

Email: [desreesab10@gmail.com](mailto:desreesab10@gmail.com)
